# Supplementary material
Source: Research Square preprint supplement (doi:10.21203/rs.3.rs-8983390/v1)
Supplement: Supplementary file 1 [file 055ec2b8ebec544b91c37d9c.docx]

| **Table 1. The baseline characteristics of participants.** | | |  |
| --- | --- | --- | --- |
| Characteristics | Osteoblastic metastasis (n=51 patients) | Bone islands  (n=74 patients) | *P* value |
| Number of lesions | 124 | 119 |  |
| Gender (male /female) | 27/24 | 39/35 | 0.56 |
| Age, mean ± SD, years | 60.45±11.83 | 63.01±11.61 | 0.23 |
| BMI, mean ± SD, kg/m2 | 22.84±3.85 | 23.37±3.57 | 0.44 |
| Lesion location (%) * |  |  | <0.001 |
| Thoracic vertebra | 72 (58.1%) | 49 (41.2%) |  |
| Lumbar vertebra | 48 (38.7%) | 25 (21.0%) |  |
| Cervical and Sacral vertebrae | 3 (2.4%) | 8 (6.7%) |  |
| Pelvis | 1 (0.8%) | 37 (31.1%) |  |
| Primary tumor type (%) # |  |  |  |
| Lung cancer | 19 (37.3%) | 28 (37.8%) |  |
| Breast cancer | 16 (31.4%) | 11 (14.9%) |  |
| Esophageal cancer |  | 5 (6.8%) |  |
| Gastric cancer | 1 (2.0%) | 6 (8.1%) |  |
| Liver cancer |  | 3 (4.1%) |  |
| Pancreatic cancer | 1 (2.0%) | 3 (4.1%) |  |
| Colorectal cancer | 1 (2.0%) | 9 (12.2%) |  |
| Renal cancer |  | 4 (5.4%) |  |
| Prostate cancer | 13 (25.5%) | 1 (1.4%) |  |
| Others |  | 4 (5.4%) |  |
| Note. SD = standard deviation. * The data is the number of lesions; # The data is the number of patients. | | | |
