# Supplementary material
Source: Research Square preprint supplement (doi:10.21203/rs.3.rs-8983390/v1)
Supplement: Supplementary file 2 [file 0e3a0ff8cc449435751cf6f0.docx]

| **Table 2. Conventional univariate analysis of DECT quantitative parameters for Osteoblastic metastasis and Bone islands.** | | | | |
| --- | --- | --- | --- | --- |
| Feature | Osteoblastic metastasis (N=124 lesions) | Bone island (N=119 lesions) | t/Z value | *P* value |
| Pre-contrast |  |  |  |  |
| VNCa (Hu) | -13.11±66.10 | -1013.86±47.22 | -14.03 | <0.001 |
| CTa (Hu) | 526.70±103.67 | 1030.18±147.41 | -13.41 | <0.001 |
| IC (mg/ml) | 9.38±2.13 | 18.14±3.19 | -13.18 | <0.001 |
| λHu (Hu/keV) | 13.70±3.23 | 25.86±4.76 | -12.83 | <0.001 |
| Rho | 314.00±60.73 | 607.61±98.22 | -13.34 | <0.001 |
| Zeff | 11.20±0.48 | 12.61±0.40 | -13.23 | <0.001 |
| Arterial phase |  |  |  |  |
| CTa (Hu) | 527.48±114.93 | 1013.55±155.06 | -13.28 | <0.001 |
| IC (mg/ml) | 9.37±2.16 | 16.86±2.90 | -13.03 | <0.001 |
| λHu (Hu/keV) | 13.28±2.80 | 24.42±4.40 | -13.07 | <0.001 |
| Rho | 321.57±62.31 | 610.59±101.90 | -13.29 | <0.001 |
| Zeff | 11.19±0.45 | 12.42±0.43 | -12.91 | <0.001 |
| Venous phase |  |  |  |  |
| CTa (Hu) | 546.87±118.01 | 1009.31±147.47 | -13.27 | <0.001 |
| IC (mg/ml) | 9.72±2.03 | 16.68±2.76 | -12.88 | <0.001 |
| λHu (Hu/keV) | 14.08±3.11 | 24.83±4.11 | -12.97 | <0.001 |
| Rho | 316.82±60.09 | 608.85±99.97 | -13.17 | <0.001 |
| Zeff | 11.24±0.42 | 12.43±0.40 | -12.84 | <0.001 |
| Note. The data is represented as means ± standard deviation. VNCa, virtual non-calcium; HU, Hounsfield unit; CTa, CT attenuation; IC, Iodine concentration; λHu, slope of the spectral Hounsfield unit curve; Rho, electron density; Zeff, effective atomic number. | | | | |
