# Supplementary material
Source: Research Square preprint supplement (doi:10.21203/rs.3.rs-8983390/v1)
Supplement: Supplementary file 3 [file 223e85d7713c03a8c2cf294a.docx]

| **Table 3. Classification performance of DECT quantitative parameters in the training and testing group** | | | | | | |
| --- | --- | --- | --- | --- | --- | --- |
|  | AUC | Sensitivity (%) | Specificity (%) | Accuracy (%) | PPV (%) | NPV (%) |
| Pre-contrast |  |  |  |  |  |  |
| VNCa (Hu) |  |  |  |  |  |  |
| Training group | 1.00 | 100.0 (70/70) | 100.0 (75/75) | 100.0 (145/145) | 100.0 (70/70) | 100.0 (75/75) |
| Testing group | 1.00 | 100.0 (48/48) | 100.0 (50/50) | 100.0 (98/98) | 100.0 (48/48) | 100.0 (50/50) |
| CTa (Hu) |  |  |  |  |  |  |
| Training group | 1.00 | 98.6 (69/70) | 98.7 (74/75) | 98.6 (143/145) | 98.6 (69/70) | 98.7 (74/75) |
| Testing group | 0.99 | 95.8 (46/48) | 98.0 (49/50) | 96.9 (95/98) | 97.9 (46/47) | 96.1 (49/51) |
| IC (mg/ml) |  |  |  |  |  |  |
| Training group | 0.99 | 95.7 (67/70) | 98.7 (74/75) | 97.2 (141/145) | 98.5 (67/68) | 96.1 (74/77) |
| Testing group | 0.98 | 93.8 (45/48) | 98.0 (49/50) | 95.9 (94/98) | 97.8 (45/46) | 94.2 (49/52) |
| λHu (Hu/keV) |  |  |  |  |  |  |
| Training group | 0.97 | 95.7 (67/70) | 96.0 (72/75) | 95.9 (139/145) | 95.7 (67/70) | 96.0 (72/75) |
| Testing group | 0.96 | 89.6 (43/48) | 100.0 (50/50) | 95.0 (93/98) | 100.0 (43/43) | 90.9 (50/55) |
| Rho |  |  |  |  |  |  |
| Training group | 0.99 | 97.1 (68/70) | 97.3 (73/75) | 97.2 (141/145) | 97.1 (68/70) | 97.3 (73/75) |
| Testing group | 0.99 | 91.7 (44/48) | 100.0 (50/50) | 95.9 (94/98) | 100.0 (44/44) | 92.6 (50/54) |
| Zeff |  |  |  |  |  |  |
| Training group | 1.00 | 98.6 (69/70) | 96.0 (72/75) | 97.2 (141/145) | 95.8 (69/72) | 98.6 (72/73) |
| Testing group | 0.98 | 93.8 (45/48) | 98.0 (49/50) | 95.9 (94/98) | 97.8 (45/46) | 94.2 (49/52) |
| Arterial phase |  |  |  |  |  |  |
| CTa (Hu) |  |  |  |  |  |  |
| Training group | 0.99 | 98.6 (69/70) | 94.7 (71/75) | 96.6 (140/145) | 94.5 (69/73) | 98.7 (71/72) |
| Testing group | 0.99 | 93.8 (45/48) | 100.0 (50/50) | 96.9 (95/98) | 100.0 (45/45) | 94.3 (50/53) |
| IC (mg/ml) |  |  |  |  |  |  |
| Training group | 0.98 | 95.7 (67/70) | 97.3 (73/75) | 96.6 (140/145) | 97.1 (67/69) | 96.1 (73/76) |
| Testing group | 0.98 | 95.8 (46/48) | 92.0 (46/50) | 93.9 (92/98) | 92.0 (46/50) | 95.8 (46/48) |
| λHu (Hu/keV) |  |  |  |  |  |  |
| Training group | 0.97 | 92.9 (65/70) | 97.3 (73/75) | 95.2 (138/145) | 97.0 (65/67) | 93.6 (73/78) |
| Testing group | 0.98 | 91.7 (44/48) | 94.0 (47/50) | 92.9 (91/98) | 93.7 (44/47) | 92.2 (47/51) |
| Rho |  |  |  |  |  |  |
| Training group | 0.99 | 97.1 (68/70) | 94.7 (71/75) | 95.9 (139/145) | 94.4 (68/72) | 97.3 (71/73) |
| Testing group | 0.99 | 93.8 (45/48) | 100.0 (50/50) | 96.9 (95/98) | 100.0 (45/45) | 94.3 (50/53) |
| Zeff |  |  |  |  |  |  |
| Training group | 0.98 | 91.4 (64/70) | 93.3 (70/75) | 92.4 (134/145) | 92.8 (64/69) | 92.1 (70/76) |
| Testing group | 0.97 | 95.8 (46/48) | 90.0 (45/50) | 92.9 (91/98) | 90.2 (46/51) | 95.7 (45/47) |
| Venous phase |  |  |  |  |  |  |
| CTa (Hu) |  |  |  |  |  |  |
| Training group | 0.99 | 100.0 (70/70) | 93.3 (70/75) | 96.6 (140/145) | 93.3 (70/75) | 100.0 (70/70) |
| Testing group | 0.98 | 93.8 (45/48) | 100.0 (50/50) | 96.9 (95/98) | 100.0 (45/45) | 94.3 (50/53) |
| IC (mg/ml) |  |  |  |  |  |  |
| Training group | 0.97 | 92.9 (65/70) | 93.3 (70/75) | 93.1 (135/145) | 92.9 (65/70) | 93.3 (70/75) |
| Testing group | 0.97 | 93.8 (45/48) | 98.0 (49/50) | 95.9 (94/98) | 97.8 (45/46) | 94.2 (49/52) |
| λHu (Hu/keV) |  |  |  |  |  |  |
| Training group | 0.99 | 95.7 (67/70) | 96.0 (72/75) | 95.9 (139/145) | 95.7 (67/70) | 96.0 (72/75) |
| Testing group | 0.96 | 91.7 (44/48) | 96.0 (48/50) | 93.9 (92/98) | 95.7 (44/46) | 92.3 (48/52) |
| Rho |  |  |  |  |  |  |
| Training group | 0.98 | 91.4 (64/70) | 96.0 (72/75) | 93.8 (136/145) | 95.5 (64/67) | 92.33 (72/78) |
| Testing group | 0.97 | 91.7 (44/48) | 100.0 (50/50) | 95.9 (94/98) | 100.0 (44/44) | 92.6 (50/54) |
| Zeff |  |  |  |  |  |  |
| Training group | 0.98 | 91.4 (64/70) | 96.0 (72/75) | 93.8 (136/145) | 95.5 (64/67) | 92.3 (72/78) |
| Testing group | 0.97 | 91.7 (44/48) | 100.0 (50/50) | 95.9 (94/98) | 100.0 (44/44) | 92.7 (50/54) |
| Note. The data is represented as means ± standard deviation. VNCa, virtual non-calcium; HU, Hounsfield unit; CTa, CT attenuation; IC, Iodine concentration; λHu, slope of the spectral Hounsfield unit curve; Rho, electron density; Zeff, effective atomic number. | | | | | | |
